# Supplementary material for: Clinical Characterization and Predictive Factors for Progression in a Cohort of Patients with Interstitial Lung Disease and Features of Autoimmunity: The Need for a Revision of IPAF Classification Criteria
Source: MDPI journal article supplement (doi:10.3390/medicina59040794), 2023-04-19
Supplement: s1 [file s1]

**Table S1:** Classification of 37 IPAF patients.

|                                                                            |           |
|----------------------------------------------------------------------------|-----------|
| CLINICAL DOMAIN                                                            | 16 (43.2) |
| Mechanic's hand                                                            | 1 (2.7)   |
| Distal digital tip ulceration                                              | 0 (0)     |
| Inflammatory arthritis or polyarticular morning joint stiffness<br>≥60 min | 9 (24.3)  |
| Palmar teleangiectasia                                                     | 5 (13.5)  |
| Raynaud phenomenon                                                         | 6 (16.2)  |
| Unexplained digital oedema                                                 | 1 (2.7)   |
| Gottron's sign                                                             | 0 (0)     |
| SEROLOGICAL DOMAIN                                                         | 31 (83.8) |
| ANA ≥ 1:320 or any titre for centromeric or nuclear pattern                | 16 (43.2) |
| RF ≥ 2 times above the upper limit                                         | 4 (10.8)  |
| Anti-CCP                                                                   | 3 (8.1)   |
| Anti-dsDNA                                                                 | 0 (0)     |
| Anti-Ro (SS-A)                                                             | 10 (27.0) |
| Anti-La (SS-B)                                                             | 0 (0)     |
| Anti-ribonucleoprotein (anti-RNP)                                          | 0 (0)     |
| Anti-Smith (anti-Sm)                                                       | 0 (0)     |
| Anti-topoisomerase (Scl 70)                                                | 0 (0)     |
| Anti-tRNA synthetase                                                       | 4 (10.8)  |
| Anti-Pm/Scl                                                                | 6 (16.2)  |
| Anti-MDA-5                                                                 | 0 (0)     |
| MORPHOLOGICAL DOMAIN                                                       | 33 (89.2) |
| NSIP                                                                       | 21 (56.8) |
| OP                                                                         | 4 (10.8)  |
| NSIP + OP                                                                  | 1 (2.7)   |
| LIP                                                                        | 0 (0)     |
| ILD + multicompartiment involvement                                        | 7 (18.9)  |
| COMBINATION OF DOMAINS                                                     |           |
| Clinical and morphological domain                                          | 5 (13.5)  |
| Serological and morphological domain                                       | 18 (48.6) |
| Clinical and serological domain                                            | 4 (10.8)  |
| All three domains                                                          | 10 (27.0) |
| OTHER MANIFESTATIONS                                                       |           |
| Sicca syndrome (confirmed by tear-and salivary tests)                      | 3 (8.1)   |
| Anti-phospholipid antibodies (at high-titre in 2 measurements)             | 6 (16.2)  |
| MSA/MAA antibodies (e.g. anti-SRP, anti-Mi2a e Mi2b)                       | 8 (21.6)  |
| ANCA (anti-MPO)                                                            | 1 (2.7)   |
| Anti-Ro52                                                                  | 8 (21.6)  |

**Data are presented as number (%).**

**Legend:** ANA, antinuclear antibody; RF, rheumatoid factor; anti CCP, anti-cyclic citrullinated peptide antibody; anti-MDA-5, anti-melanoma differentiation-associated gene 5; NSIP, nonspecific interstitial pneumonia; OP, organizing pneumonia; LIP, lymphocytic interstitial pneumonia; ILD, interstitial lung disease; MSA, myositis specific antibodies; MAA, myositis associated antibodies; ANCA, anti-neutrophil cytoplasmic antibodies; anti-myeloperoxidase antibodies. See the section "Material and Methods" for further information.

**Table S2:** Prevalence of autoantibody positivity among IPAF, CTD-ILD and UIPAF patients.

|                                                                                                                                                                                    | IPAF      | CTD-ILD   | UIPAF    | <i>p</i> -value |
|------------------------------------------------------------------------------------------------------------------------------------------------------------------------------------|-----------|-----------|----------|-----------------|
| ANA $\geq$ 1:320 or any titre for centromeric or nuclear pattern                                                                                                                   | 16 (43.2) | 19 (35.8) | 6 (54.5) | 0.79            |
| RF $\geq$ 2 times above the upper limit                                                                                                                                            | 4 (10.8)  | 8 (15.1)  | 1 (9.1)  | 0.91            |
| Anti-CCP                                                                                                                                                                           | 3 (8.1)   | 4 (7.5)   | 0 (0)    | 1               |
| Anti-dsDNA                                                                                                                                                                         | 0 (0)     | 2 (3.8)   | 0 (0)    | 0.61            |
| Anti-Ro (SS-A)                                                                                                                                                                     | 10 (27.0) | 11 (20.8) | 0 (0)    | 0.17            |
| Anti-La (SS-B)                                                                                                                                                                     | 0 (0)     | 2 (3.8)   | 0 (0)    | 0.61            |
| Anti-Ro52                                                                                                                                                                          | 8 (21.6)  | 5 (9.4)   | 0 (0)    | 0.10            |
| Anti-ribonucleoprotein (anti-RNP)                                                                                                                                                  | 0 (0)     | 1 (1.9)   | 0 (0)    | 1               |
| Anti-Smith (anti-Sm)                                                                                                                                                               | 0 (0)     | 0 (0)     | 0 (0)    | 1               |
| Anti-topoisomerase (Scl-70)                                                                                                                                                        | 0 (0)     | 1 (1.9)   | 0 (0)    | 1               |
| Anti-tRNA synthetase                                                                                                                                                               | 4 (10.8)  | 7 (13.2)  | 1 (9.1)  | 1               |
| Anti-Pm/Scl                                                                                                                                                                        | 6 (16.2)  | 2 (3.8)   | 0 (0)    | 0.09            |
| Anti-MDA-5                                                                                                                                                                         | 0 (0)     | 0 (0)     | 0 (0)    | 1               |
| <b>Data are presented as number (%).</b>                                                                                                                                           |           |           |          |                 |
| <b>Legend:</b> ANA, antinuclear antibody; RF, rheumatoid factor; anti CCP, anti Cyclic Citrullinated Peptide antibody; anti-MD-5, anti-melanoma differentiation-associated gene 5. |           |           |          |                 |

**Table S3:** Clinical characteristics of IPAF patients progressed to CTD-ILD or UIPAF during the follow-up.

| Patient                                                                                                                                                                                                                                                                                                                          | Clinical characteristics                                                                                    | New feature                       | New diagnosis           |
|----------------------------------------------------------------------------------------------------------------------------------------------------------------------------------------------------------------------------------------------------------------------------------------------------------------------------------|-------------------------------------------------------------------------------------------------------------|-----------------------------------|-------------------------|
| P1                                                                                                                                                                                                                                                                                                                               | Female, 67 years, ever smoker, NSIP pattern, anti Jo-1 positivity                                           | Arthritis                         | Antisynthetase Syndrome |
| P2                                                                                                                                                                                                                                                                                                                               | Female, 64 years, former smoker, NSIP pattern, hand arthritis                                               | Sicca syndrome with positive MSGB | Sjogren Syndrome        |
| P3                                                                                                                                                                                                                                                                                                                               | Female, 65 years, former smoker, fibrotic NSIP pattern, RF $\geq$ 2 times above the upper limit             | UIP                               | UIPAF                   |
| P4                                                                                                                                                                                                                                                                                                                               | Male, 72 years, former smoker, OP pattern, RF $\geq$ 2 times above the upper limit, anti CCP positivity     | Arthritis                         | Rheumatoid arthritis    |
| P5                                                                                                                                                                                                                                                                                                                               | Male, 72 years, former smoker, UIP pattern, ANA 1:640 with granular pattern, anti-Ro52, hand oligoarthritis | Sicca syndrome with positive MSGB | Sjogren Syndrome        |
| P6                                                                                                                                                                                                                                                                                                                               | Male, 61 years former smoker, NSIP pattern, ANA 1:80 with nucleolar pattern                                 | UIP                               | UIPAF                   |
| As positive MSGB, we considered labial salivary gland with focal lymphocytic sialadenitis and focus score of $\geq$ 1 foci/4 mm <sup>2</sup> . See "Materials and methods" for further information.                                                                                                                              |                                                                                                             |                                   |                         |
| <b>Legend:</b> NSIP, nonspecific interstitial pneumonia; MSGB, minor salivary gland biopsy; RF, rheumatoid factor; UIP, usual interstitial pneumonia; UIPAF, "usual" interstitial pneumonia with autoimmune features; OP, organizing pneumonia; anti-CCP, anti-Cyclic Citrullinated Peptide antibody; ANA, antinuclear antibody. |                                                                                                             |                                   |                         |
